# Supplementary material
Source: publisher site journal article supplement (https://www.degruyterbrill.com/publication/isbn/9783050056005/downloadAsset/9783050056005_Buchinformation.pdf)
Supplement: Supplementary file 1 [file 9783050056005_Buchinformation.pdf]

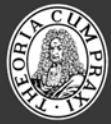

# Akademie Verlag

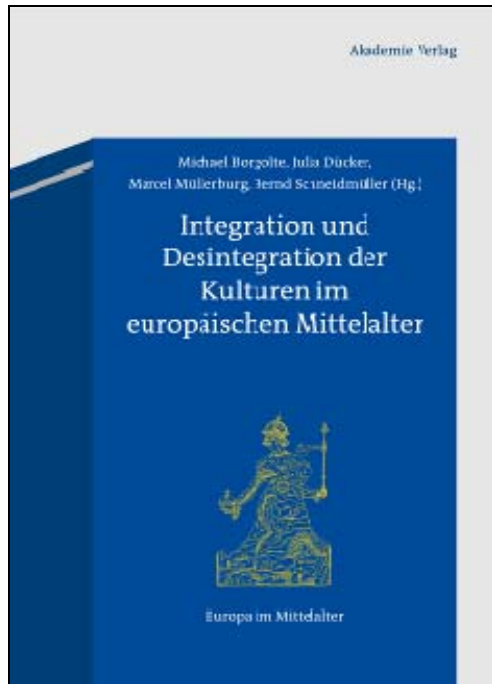

Michael Borgolte, Julia Dücker, Marcel Müllerburg, Bernd Schneidmüller (Hrsg.)

## **Integration und Desintegration der Kulturen im europäischen Mittelalter**

*Europa im Mittelalter*, Band 18

2011, ca. 650 S. – ca. 45 s/w- und 19 Farbbabb.

170 x 240 mm

Festeinband, ca. € 99,80

ISBN 978-3-05-004973-1

Das mittelalterliche Europa war keine christliche Einheitskultur, sondern geprägt von vielfältigen Prozessen des Kontakts und der Abgrenzung zwischen Kulturen; die drei monotheistischen Religionen Christentum, Judentum und Islam spielten dabei eine herausragende Rolle.

Seit 2005 erforscht das DFG-Schwerpunktprogramm „Integration und Desintegration der Kulturen im europäischen Mittelalter“ die Geschichte Europas als Geschichte kultureller Differenzen.

Der Band dokumentiert die Dynamiken und Erträge eines wissenschaftsorganisatorischen Experiments: Gegliedert in fächerübergreifende Arbeitsgruppen, erforschten 24 Einzelprojekte aus 14 Disziplinen Integrations- und Desintegrationsprozesse von Skandinavien bis Ägypten, von der Iberischen Halbinsel bis zu den Steppen Zentralasiens in komparativem Zugriff; sie präsentieren ihre Ergebnisse nun in Beiträgen, die von mehreren Autorinnen und Autoren gemeinsam verfasst worden sind.
